# Supplementary material for: Oral cancer patients experience mechanical and chemical sensitivity at the site of the cancer
Source: PubMed Central journal article supplement (PMC9650819; doi:10.1186/s12885-022-10282-3), 2022-11-11

## **Supplementary Figures**

### **Oral cancer patients experience mechanical and chemical sensitivity at the site of the cancer**

Caroline M. Sawicki<sup>1</sup>, Malvin N. Janal<sup>2</sup>, Samuel J. Nicholson<sup>3</sup>, Angie K. Wu<sup>4</sup>, Brian L. Schmidt<sup>3,4,5</sup>  
and Donna G. Albertson<sup>3,4,5</sup>

Departments of <sup>1</sup>Pediatric Dentistry, <sup>2</sup>Epidemiology & Health Promotion and <sup>3</sup>Oral and Maxillofacial Surgery, <sup>4</sup>Bluestone Center for Clinical Research and <sup>5</sup>NYU Oral Cancer Center, New York University College of Dentistry

**Supplementary Figure A.** Staircases for healthy subjects. Filled circles = fiber detected.

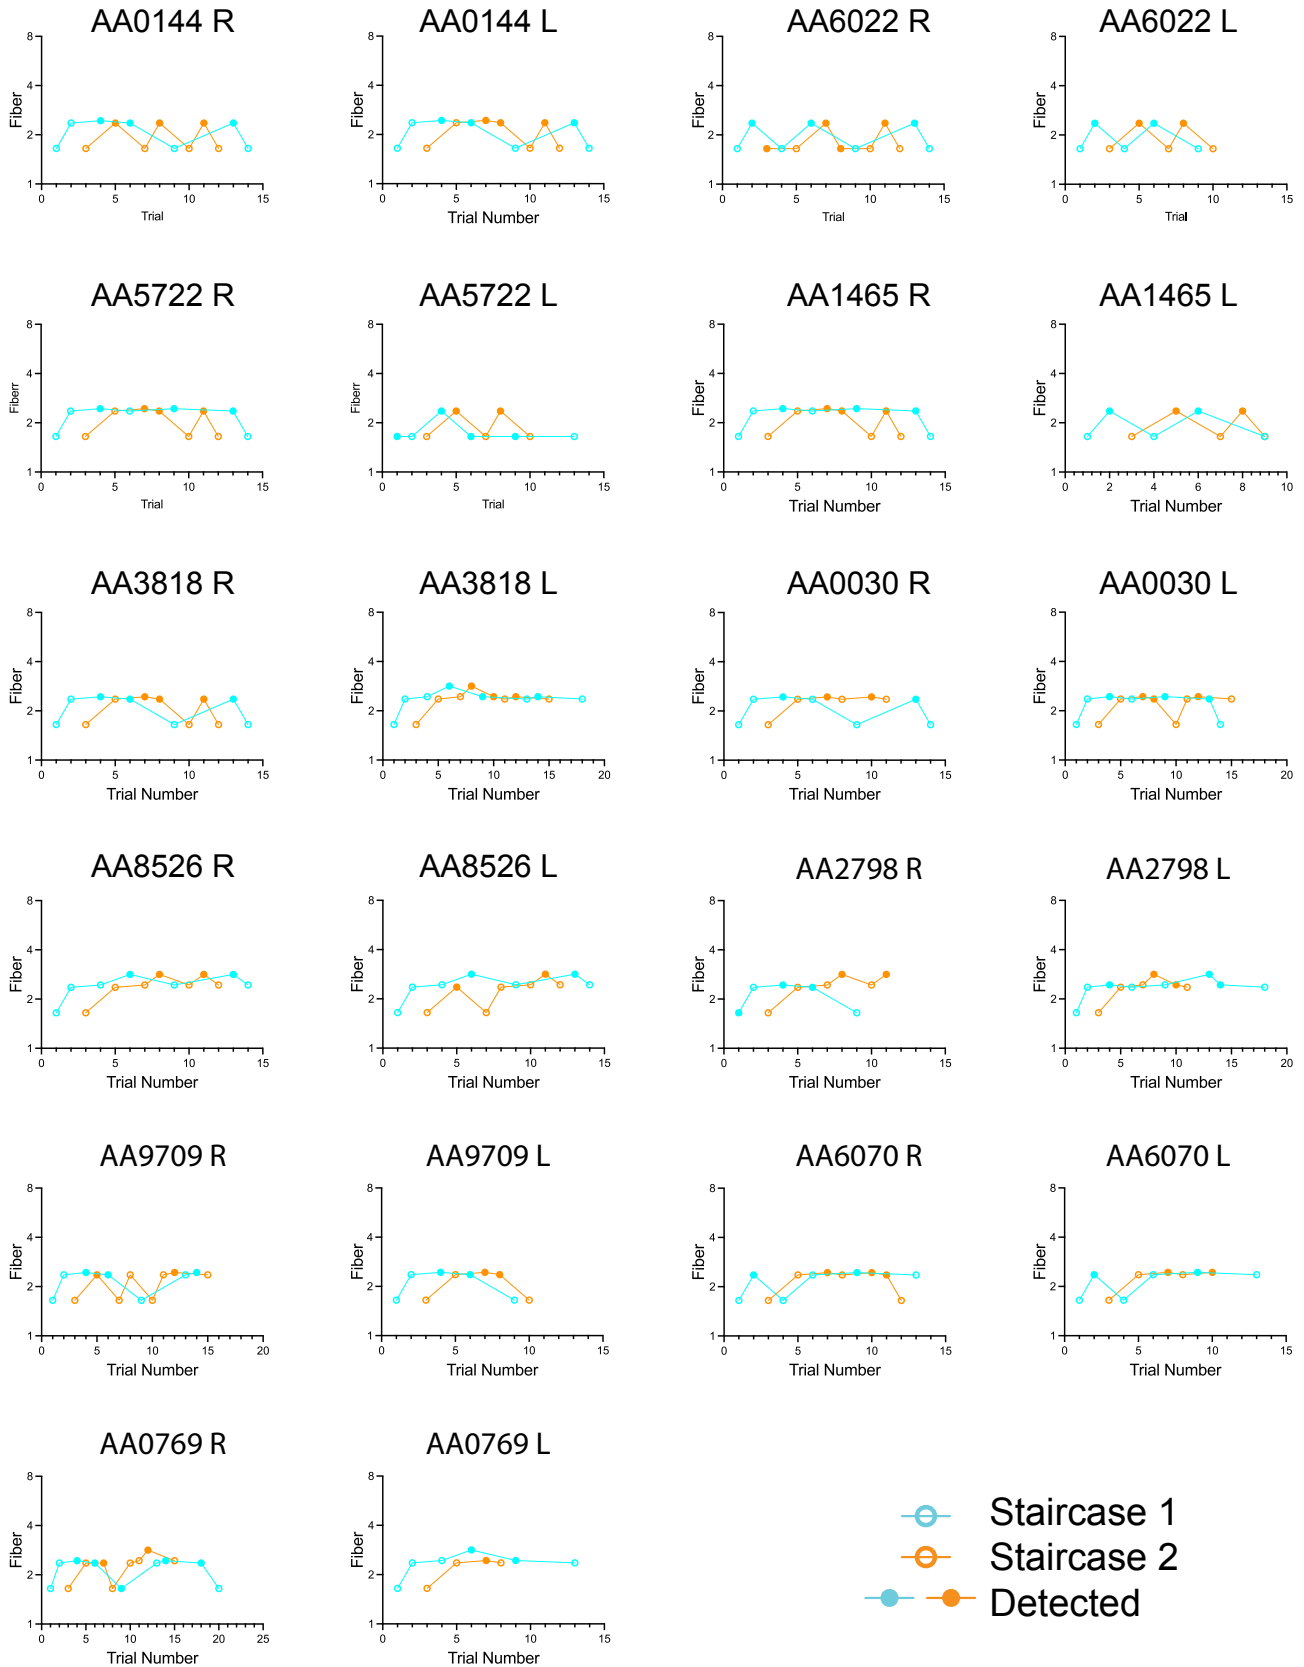

**Supplementary Figure B.** Testing regime for patients in cohort #1. Filled circles = fiber detected, filled circles with black boundary = fiber reported as painful. Black dotted line = maximum fiber, 6.65.

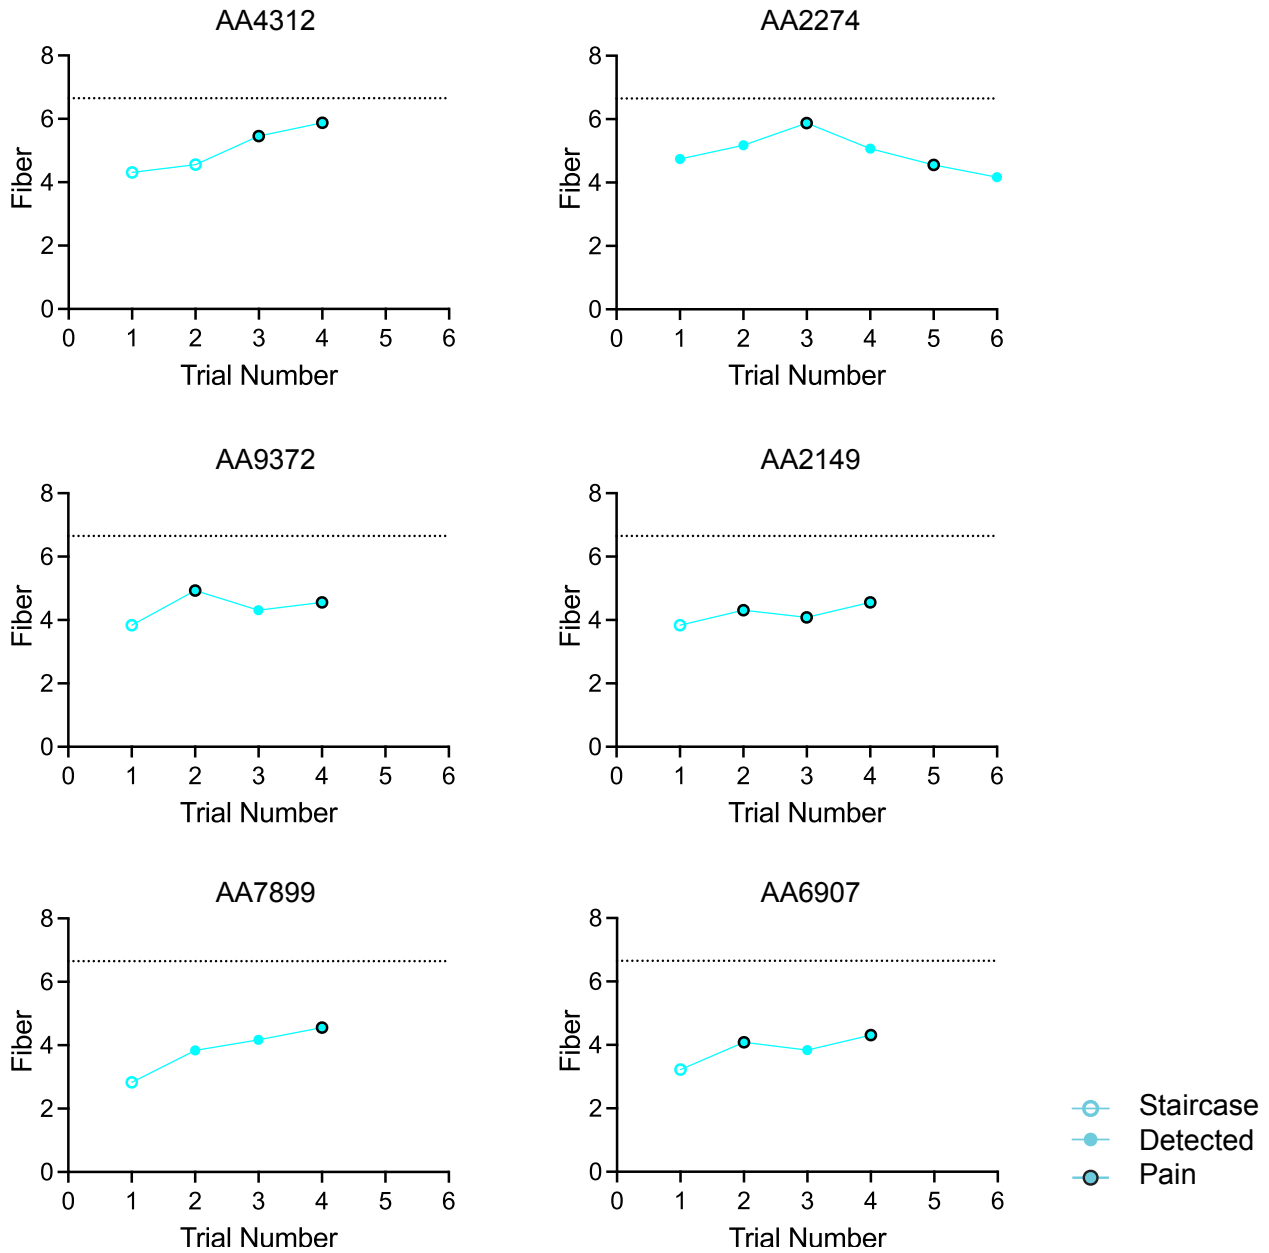

**Supplementary Figure C.** MPT measurement in cohort #2. Filled circles = fiber detected, filled circles with black boundary = fiber reported as painful. Black dotted line = maximum fiber, 6.65.

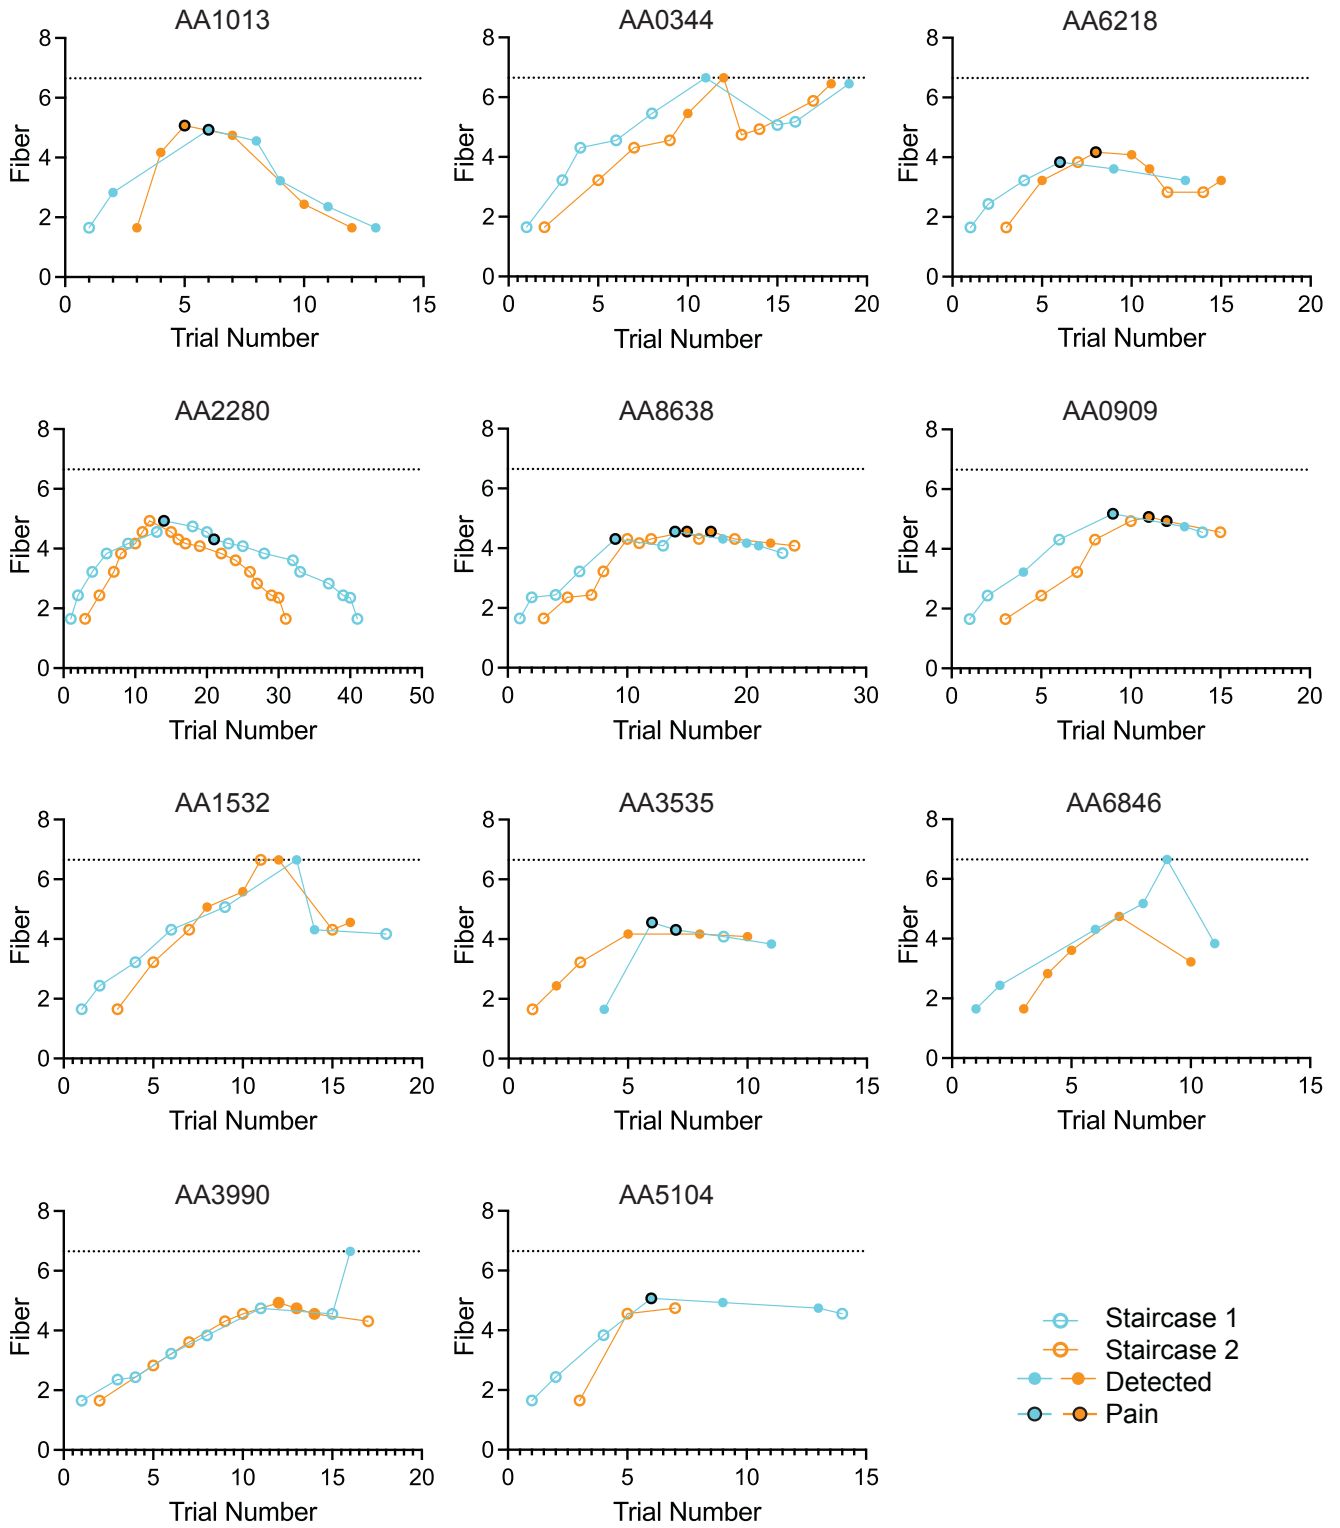

**Supplementary Figure D.** Staircases for testing the contralateral normal side of patients in cohort #2. Filled circles = fiber detected, filled circles with black boundary = fiber reported as painful. Black dotted line = maximum fiber, 6.65.

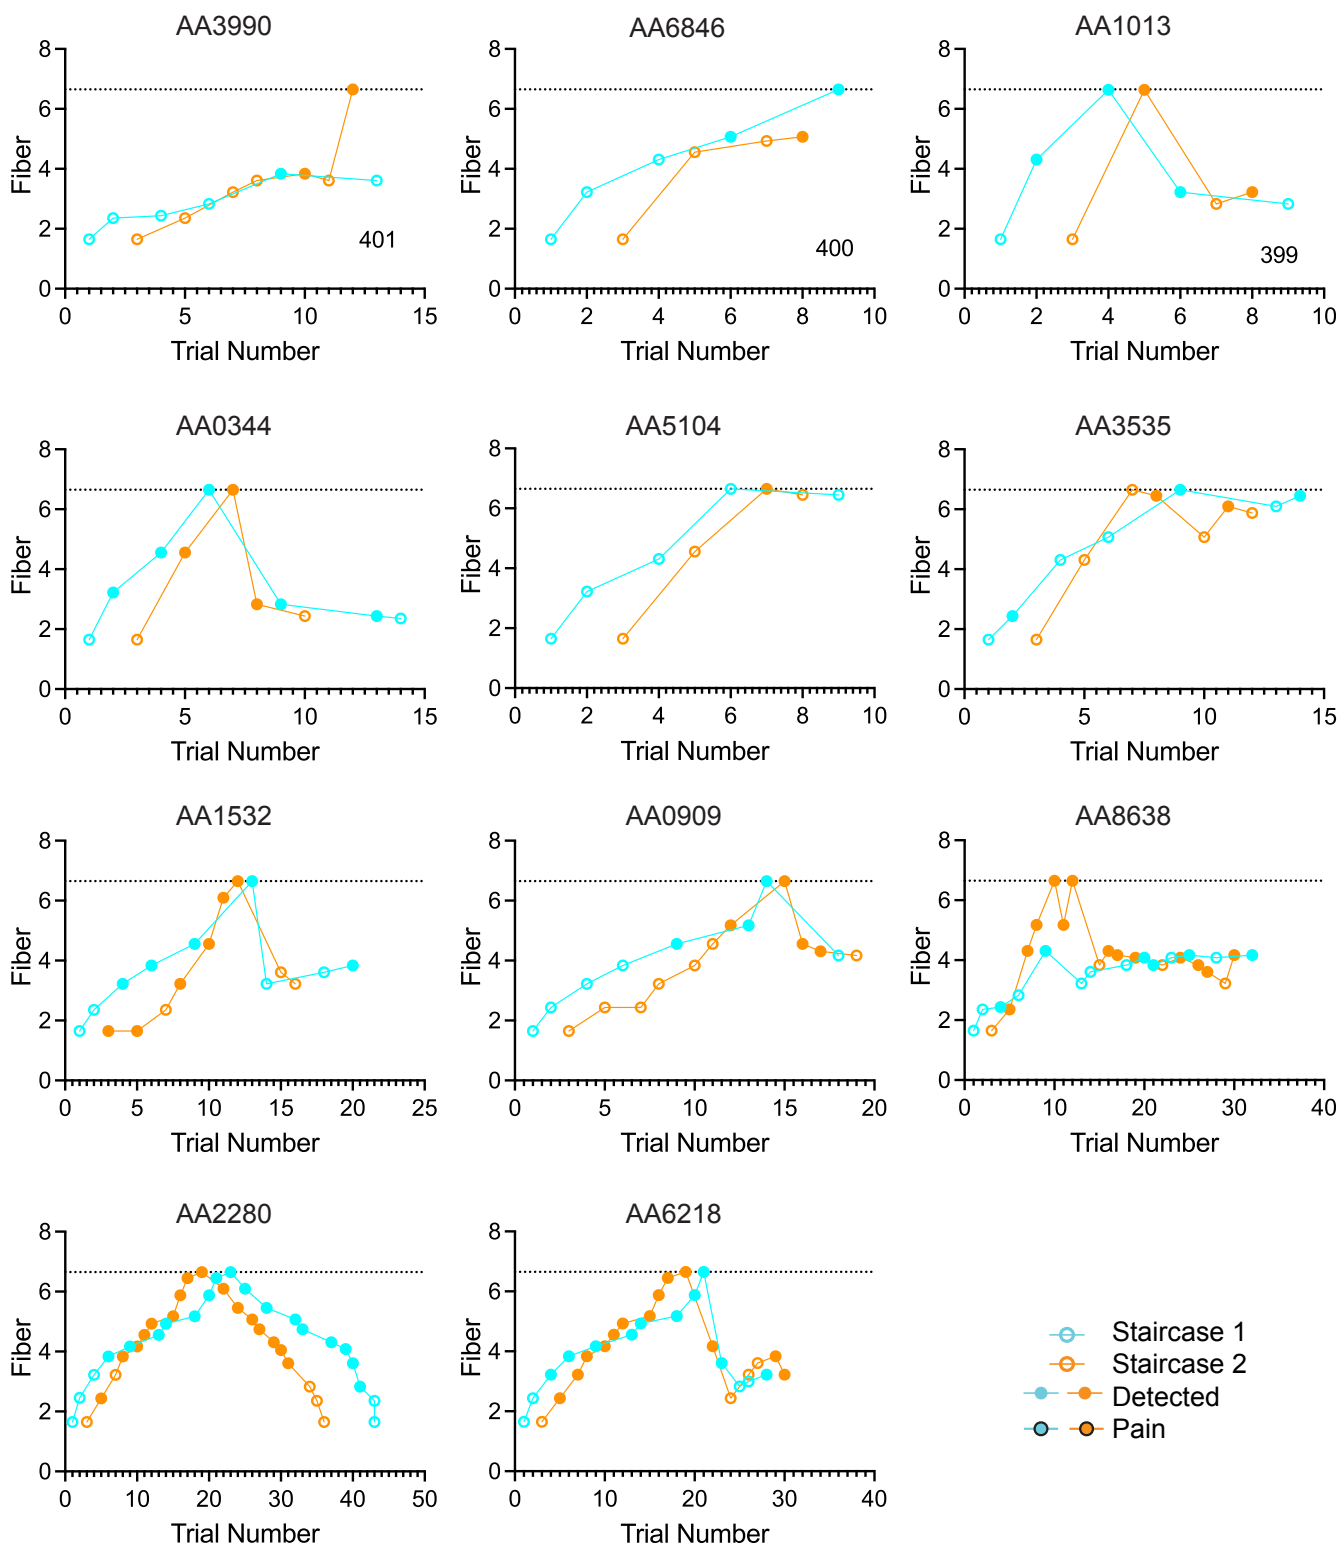

**Supplementary Figure E.** No difference in dose-response plots of VAS responses on the left and right sides of the tongue in healthy subjects.

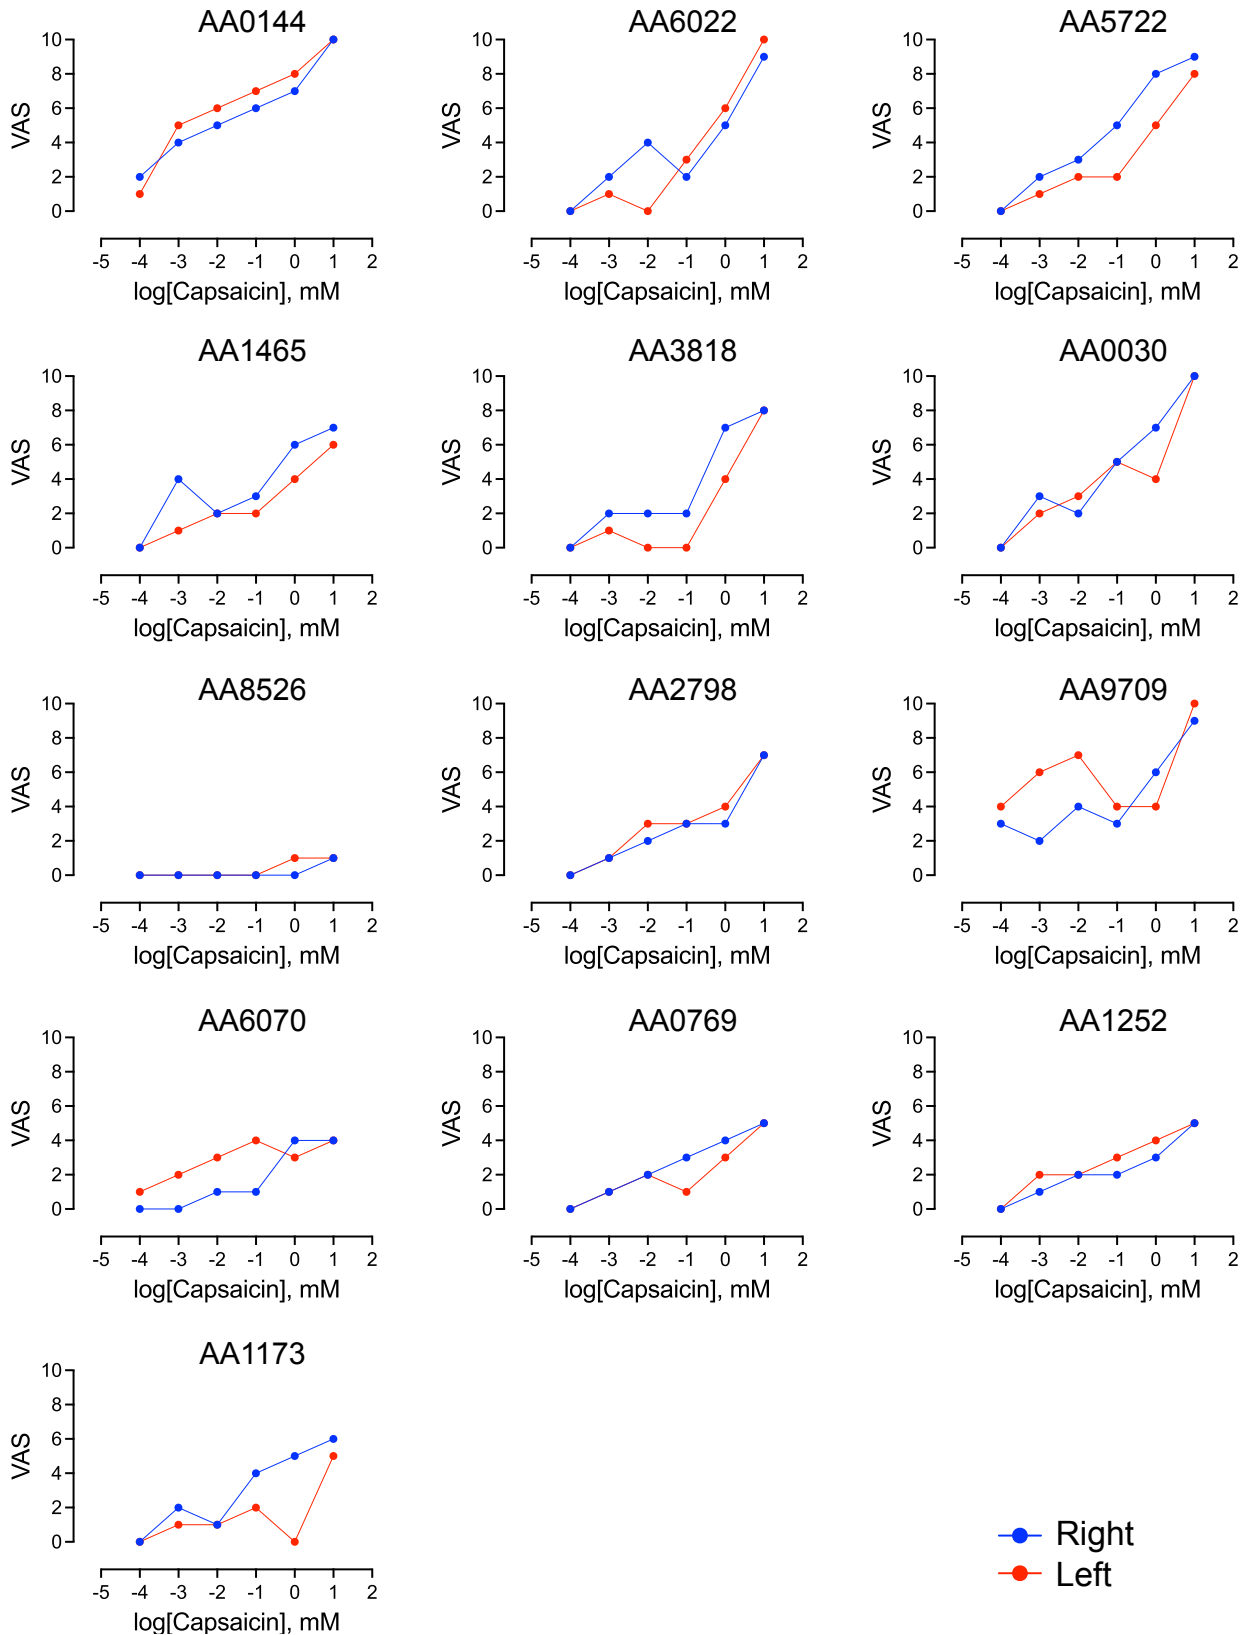

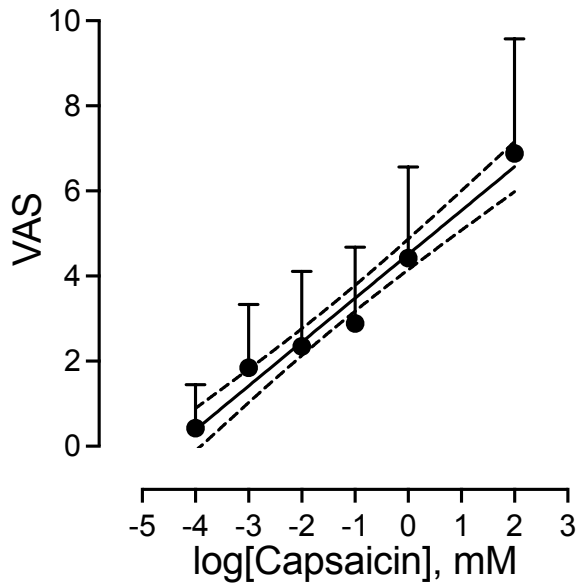

**Supplementary Figure F.** Visual analog scores increase with increased capsaicin concentration. Shown is the best fit line and 95% confidence intervals of the best fit line for the VAS from healthy subjects (mean + SD) for the left and right sides of the tongue (n=26 measurements). Simple linear regression was used to test if capsaicin concentration significantly predicted VAS. The fitted regression model was:  $y = 1.030x + 4.508$ . The overall regression was statistically significant ( $R^2 = 0.5383$ ,  $F(1, 154) = 179.5$ ,  $p < 0.0001$ ).

**Supplementary Figure G.** Dose-response plots of VAS responses of oral cancer patients are shifted to the left relative to dose-responses for testing on a contralateral matched normal site.

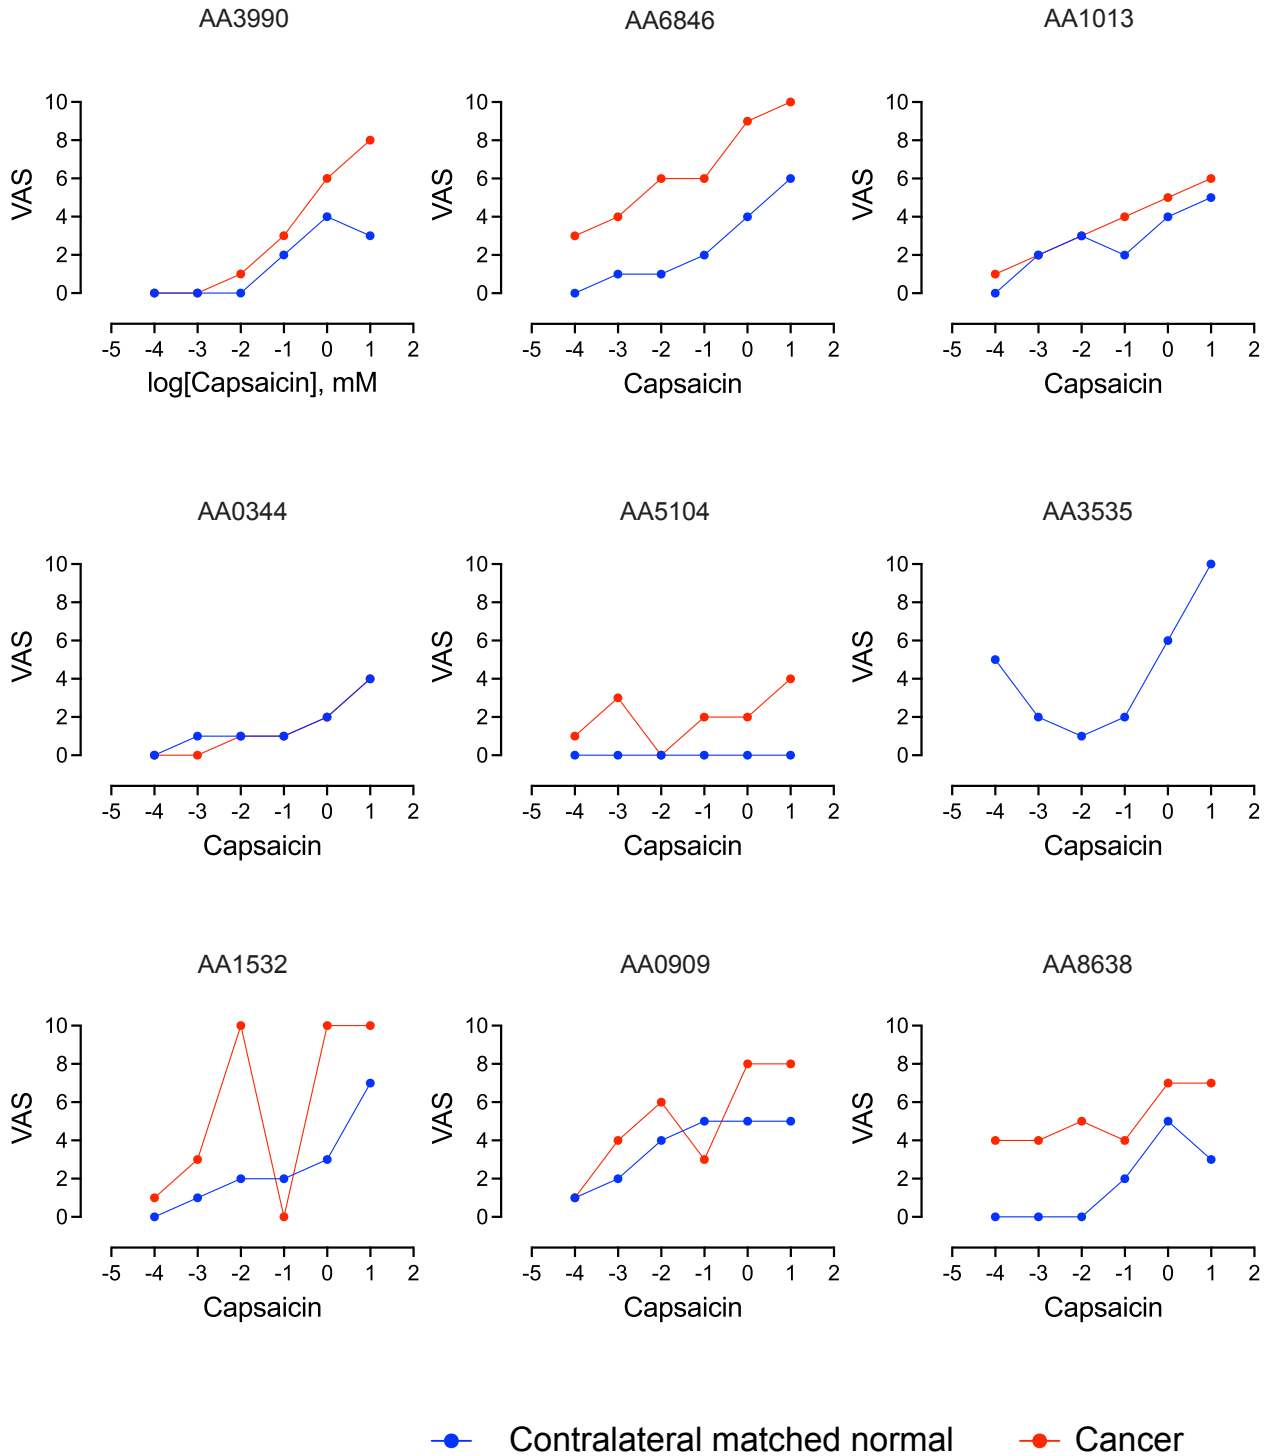

Supplement: 12885_2022_10282_MOESM1_ESM.pdf [file 12885_2022_10282_MOESM1_ESM.pdf]
